# Supplementary material for: An Overview of Experiences Made and Tools Used to Inform the Public on Ambient Air Quality
Source: MDPI journal article supplement (doi:10.3390/atmos12111524), 2021-11-18
Supplement: s1 [file s1]

# Supplementary Materials:

## An Overview of Experiences Made and Tools Used to Inform the Public on Ambient Air Quality

Alessandra Fino <sup>1,\*</sup>, Francesca Vichi <sup>1</sup>, Cristina Leonardi <sup>2</sup> and Krishnendu Mukhopadhyay <sup>3</sup>

- <sup>1</sup> National Research Council –Institute of Atmospheric Pollution Research (CNR-IIA), Monterotondo, 00015 Rome, Italy; vichi@iia.cnr.it
- <sup>2</sup> National Research Council –Institute of Atmospheric Pollution Research (CNR-IIA) c/o Ministry of Ecological Transition, 00147 Rome, Italy; leonardi@iia.cnr.it
- <sup>3</sup> Department of Environmental Health Engineering, Faculty of Public Health, Sri Ramachandra Institute of Higher Education and Research (DU), Chennai, 600116 Tamil Nadu, India; krishnendu@ehe.org.in
- \* Correspondence: alessandra.fino@iia.cnr.it; Tel.: +39-06-90672396

### EUROPE

### UNITED KINGDOM

**Table S1.** Air Quality Index in United Kingdom.

| Class | Index category | O <sub>3</sub><br>µg/m <sup>3</sup><br>running 8-hour | NO <sub>2</sub><br>µg/m <sup>3</sup><br>1-hour | SO <sub>2</sub><br>µg/m <sup>3</sup><br>15 min | PM <sub>2.5</sub><br>µg/m <sup>3</sup><br>24-hour* | PM <sub>10</sub><br>µg/m <sup>3</sup><br>24-hour* |
|-------|----------------|-------------------------------------------------------|------------------------------------------------|------------------------------------------------|----------------------------------------------------|---------------------------------------------------|
| 1     | Low            | 0-33                                                  | 0-67                                           | 0-88                                           | 0-11                                               | 0-16                                              |
| 2     | Low            | 34-66                                                 | 68-134                                         | 89-177                                         | 12-23                                              | 17-33                                             |
| 3     | Low            | 67-100                                                | 135-200                                        | 178-266                                        | 24-35                                              | 34-50                                             |
| 4     | Moderate       | 101-120                                               | 201-267                                        | 267-354                                        | 36-41                                              | 51-58                                             |
| 5     | Moderate       | 121-140                                               | 268-334                                        | 355-443                                        | 42-47                                              | 59-66                                             |
| 6     | Moderate       | 141-160                                               | 335-400                                        | 444-532                                        | 48-53                                              | 67-75                                             |
| 7     | High           | 161-187                                               | 401-467                                        | 533-710                                        | 54-58                                              | 76-83                                             |
| 8     | High           | 188-213                                               | 468-534                                        | 711- 887                                       | 59-64                                              | 84-91                                             |
| 9     | High           | 214-240                                               | 535-600                                        | 888- 1064                                      | 65-70                                              | 92-100                                            |
| 10    | Very High      | 241 or more                                           | 601 or more                                    | 1065 or more                                   | 71 or more                                         | 101 or more                                       |

\* daily mean concentration for historical data, latest 24 hour running mean for the current day

## SPAIN

**Table S2.** Air Quality Index in Spain.

| <b>Index category</b>       | <b>SO<sub>2</sub></b><br><b>µgm<sup>-3</sup></b><br><b>1-hour</b> | <b>PM<sub>2.5</sub></b><br><b>µgm<sup>-3</sup></b><br><b>24-hour*</b> | <b>PM<sub>10</sub></b><br><b>µgm<sup>-3</sup></b><br><b>24-hour*</b> | <b>O<sub>3</sub></b><br><b>µgm<sup>-3</sup></b><br><b>running 8-hour</b> | <b>NO<sub>2</sub></b><br><b>µgm<sup>-3</sup></b><br><b>1-hour</b> |
|-----------------------------|-------------------------------------------------------------------|-----------------------------------------------------------------------|----------------------------------------------------------------------|--------------------------------------------------------------------------|-------------------------------------------------------------------|
| Buena                       | 0-100                                                             | 0-10                                                                  | 0-20                                                                 | 0-50                                                                     | 0-40                                                              |
| Razonablemente buena        | 101-200                                                           | 11-20                                                                 | 21-40                                                                | 51-100                                                                   | 41-90                                                             |
| Regular                     | 201-350                                                           | 21-25                                                                 | 41-50                                                                | 101-130                                                                  | 91-120                                                            |
| Desfavorable                | 351-500                                                           | 26-50                                                                 | 51-100                                                               | 131-240                                                                  | 121-230                                                           |
| Muy desfavorable            | 501-750                                                           | 51-75                                                                 | 101-150                                                              | 241-380                                                                  | 231-340                                                           |
| Extremadamente desfavorable | 751-1250                                                          | 76-800                                                                | 151-1200                                                             | 381-800                                                                  | 341-1000                                                          |

\* latest 24 hour running mean

## FRANCE

**Table S3.** Air Quality Index in France.

| <b>Index category</b> | <b>PM<sub>2.5</sub></b><br><b>µgm<sup>-3</sup></b><br><b>24-hour**</b> | <b>PM<sub>10</sub></b><br><b>µgm<sup>-3</sup></b><br><b>24-hour**</b> | <b>NO<sub>2</sub></b><br><b>µgm<sup>-3</sup></b><br><b>1-hour*</b> | <b>O<sub>3</sub></b><br><b>µgm<sup>-3</sup></b><br><b>1-hour*</b> | <b>SO<sub>2</sub></b><br><b>µgm<sup>-3</sup></b><br><b>1-hour*</b> |
|-----------------------|------------------------------------------------------------------------|-----------------------------------------------------------------------|--------------------------------------------------------------------|-------------------------------------------------------------------|--------------------------------------------------------------------|
| Bon                   | 0-10                                                                   | 0-20                                                                  | 0-40                                                               | 0-50                                                              | 0-100                                                              |
| Moyen                 | 11-20                                                                  | 21-40                                                                 | 41-90                                                              | 51-100                                                            | 101-200                                                            |
| Degrade               | 21-25                                                                  | 41-50                                                                 | 91-120                                                             | 101-130                                                           | 201-350                                                            |
| Mauvais               | 26-50                                                                  | 51-100                                                                | 121-230                                                            | 131-240                                                           | 351-500                                                            |
| Tres Mauvais          | 51-75                                                                  | 101-150                                                               | 231-340                                                            | 241-380                                                           | 501-750                                                            |
| Extremement Mauvais   | >75                                                                    | >150                                                                  | >340                                                               | >380                                                              | >750                                                               |

\* the maximum of the hourly concentrations of the day

\*\* maximum of the daily averages

## GERMANY

**Table S4.** Air Quality Index in Germany.

| <b>Index category</b> | <b>NO<sub>2</sub></b><br><b>µg/m<sup>3</sup></b><br><b>1-hour</b> | <b>PM<sub>10</sub></b><br><b>µg/m<sup>3</sup></b><br><b>running 24-hour</b> | <b>O<sub>3</sub></b><br><b>µg/m<sup>3</sup></b><br><b>1-hour</b> |
|-----------------------|-------------------------------------------------------------------|-----------------------------------------------------------------------------|------------------------------------------------------------------|
| very poor             | > 200                                                             | > 100                                                                       | > 240                                                            |
| poor                  | 101-200                                                           | 51-100                                                                      | 181-240                                                          |
| moderate              | 41-100                                                            | 36-50                                                                       | 121-180                                                          |
| good                  | 21-40                                                             | 21-35                                                                       | 61-120                                                           |
| very good             | 0-20                                                              | 0-20                                                                        | 0-60                                                             |

## EUROPEAN UNION

**Table S5.** Harmonized Air Quality Index for the European Union.

| Index category | PM <sub>2.5</sub><br>µgm <sup>-3</sup><br>24-hour* | PM <sub>10</sub><br>µgm <sup>-3</sup><br>24-hour* | NO <sub>2</sub><br>µgm <sup>-3</sup><br>1-hour | O <sub>3</sub><br>µgm <sup>-3</sup><br>1-hour | SO <sub>2</sub><br>µgm <sup>-3</sup><br>1-hour |
|----------------|----------------------------------------------------|---------------------------------------------------|------------------------------------------------|-----------------------------------------------|------------------------------------------------|
| Good           | 0-10                                               | 0-20                                              | 0-40                                           | 0-50                                          | 0-100                                          |
| Fair           | 10-20                                              | 20-40                                             | 40-90                                          | 50-100                                        | 100-200                                        |
| Moderate       | 20-25                                              | 40-50                                             | 90-120                                         | 100-130                                       | 200-350                                        |
| Poor           | 25-50                                              | 50-100                                            | 120-230                                        | 130-240                                       | 350-500                                        |
| Very poor      | 50-75                                              | 100-150                                           | 230-340                                        | 240-380                                       | 500-750                                        |
| Extremely poor | 75-800                                             | 150-1200                                          | 340-1000                                       | 380-800                                       | 750-1250                                       |

\* 24-hour running means (if at least 24 hours are available)

**Table S6.** Air quality standards for the protection of human health, as given in the European Ambient Air Quality Directives.

| Pollutant         | Averaging period          | Concentration               | Kind of standard                                                                                    |
|-------------------|---------------------------|-----------------------------|-----------------------------------------------------------------------------------------------------|
| PM <sub>10</sub>  | 24-hour                   | 50 µg/m <sup>3</sup>        | Limit value, not to be exceeded on more than 35 days per year                                       |
|                   | year                      | 40 µg/m <sup>3</sup>        | Limit value                                                                                         |
| PM <sub>2.5</sub> | year                      | 25 µg/m <sup>3</sup>        | Limit value                                                                                         |
|                   |                           | 0-20% reduction in exposure | National exposure reduction target based on the Average exposure indicator (AEI) <sup>1</sup>       |
| O <sub>3</sub>    | maximum daily 8-hour mean | 120 µg/m <sup>3</sup>       | Target value, not to be exceeded on more than 25 days per year, averaged over 3 years               |
|                   |                           | 120 µg/m <sup>3</sup>       | Long-term objective                                                                                 |
|                   | 1-hour                    | 180 µg/m <sup>3</sup>       | Information threshold                                                                               |
|                   |                           | 240 µg/m <sup>3</sup>       | Alert threshold                                                                                     |
| NO <sub>2</sub>   | 1-hour                    | 200 µg/m <sup>3</sup>       | Limit value, not to be exceeded on more than 18 hours per year                                      |
|                   |                           | 400 µg/m <sup>3</sup>       | Alert threshold, to be measured over 3 consecutive hours over 100 km <sup>2</sup> or an entire zone |
| BaP               | year                      | 40 µg/m <sup>3</sup>        | Limit value                                                                                         |
|                   | year                      | 1 ng/m <sup>3</sup>         | Target value                                                                                        |

|                 |                           |                       |                                                                                                     |
|-----------------|---------------------------|-----------------------|-----------------------------------------------------------------------------------------------------|
| SO <sub>2</sub> | 1-hour                    | 350 µg/m <sup>3</sup> | Limit value, not to be exceeded on more than 24 hours per year                                      |
|                 |                           | 500 µg/m <sup>3</sup> | Alert threshold, to be measured over 3 consecutive hours over 100 km <sup>2</sup> or an entire zone |
|                 | 24-hour                   | 125 µg/m <sup>3</sup> | Limit value, not to be exceeded on more than 3 days per year                                        |
| CO              | maximum daily 8-hour mean | 10 mg/m <sup>3</sup>  | Limit value                                                                                         |
| Benzene         | year                      | 5 µg/m <sup>3</sup>   | Limit value                                                                                         |
| Pb              | year                      | 0.5 µg/m <sup>3</sup> | Limit value                                                                                         |
| As              | year                      | 6 ng/m <sup>3</sup>   | Target value                                                                                        |
| Cd              | year                      | 5 ng/m <sup>3</sup>   | Target value                                                                                        |
| Ni              | year                      | 20 ng/m <sup>3</sup>  | Target value                                                                                        |

**Table S7.** Health messages associated to AQI.

| AQ index       | General population                                                                                                  | Sensitive population                                                                                |
|----------------|---------------------------------------------------------------------------------------------------------------------|-----------------------------------------------------------------------------------------------------|
| Good           | The air quality is good. Enjoy your usual outdoor activities                                                        | The air quality is good. Enjoy your usual outdoor activities                                        |
| Fair           | Enjoy your usual outdoor activities                                                                                 | Enjoy your usual outdoor activities                                                                 |
| Moderate       | Enjoy your usual outdoor activities                                                                                 | Consider reducing intense outdoor activities, if you experience symptoms                            |
| Poor           | Consider reducing intense activities outdoors, if you experience symptoms such as sore eyes, a cough or sore throat | Consider reducing physical activities, particularly outdoors, especially if you experience symptoms |
| Very poor      | Consider reducing intense activities outdoors, if you experience symptoms such as sore eyes, a cough or sore throat | Reduce physical activities, particularly outdoors, especially if you experience symptoms            |
| Extremely poor | Reduce physical activities outdoors                                                                                 | Avoid physical activities outdoors                                                                  |

## AMERICA

USA

**Table S8.** USA National Air Quality Standards (NAAQS) for the regulated pollutants.

| Pollutant            | Primary/<br>Secondary | Averaging<br>Time | Level  | Statistical Form of the standard           |
|----------------------|-----------------------|-------------------|--------|--------------------------------------------|
| Carbon Monoxide (CO) | primary               | 8 hours           | 9 ppm  | Not to be exceeded more than once per year |
|                      |                       | 1hour             | 35 ppm |                                            |

|                                          |        |                       |                       |    |                            |                                                                                           |
|------------------------------------------|--------|-----------------------|-----------------------|----|----------------------------|-------------------------------------------------------------------------------------------|
| <u>Lead</u><br><u>(Pb)</u>               |        | primary and secondary | Rolling month average | 3- | 0.15 µg/m <sup>3</sup> (1) | Not to be exceeded                                                                        |
| Nitrogen Dioxide (NO <sub>2</sub> )      |        | primary               | 1hour                 |    | 100 ppb                    | 98 <sup>th</sup> percentile of 1-hour daily maximum concentrations, averaged over 3 years |
|                                          |        | primary and secondary | 1year                 |    | 53 ppb (2)                 | Annual Mean                                                                               |
| Ozone (O <sub>3</sub> )                  |        | primary and secondary | 8 hours               |    | 0.070 ppm (3)              | Annual fourth-highest daily maximum 8- hour concentration, averaged over 3 years          |
| <u>Particulate Matter</u><br><u>(PM)</u> | PM 2.5 | primary               | 1year                 |    | 12.0 µg/m <sup>3</sup>     | annual mean, averaged over 3 years                                                        |
|                                          |        | secondary             | 1year                 |    | 15.0 µg/m <sup>3</sup>     | annual mean, averaged over 3 years                                                        |
|                                          |        | primary and secondary | 24 hours              |    | 35 µg/m <sup>3</sup>       | 98 <sup>th</sup> percentile, averaged over 3 years                                        |
|                                          | PM 10  | primary and secondary | 24 hours              |    | 150 µg/m <sup>3</sup>      | Not to be exceeded more than once per year on average over 3 years                        |
| Sulfur Dioxide (SO <sub>2</sub> )        |        | primary               | 1hour                 |    | 75 ppb (4)                 | 99 <sup>th</sup> percentile of 1-hour daily maximum concentrations, averaged over 3 years |
|                                          |        | secondary             | 3 hours               |    | 0.5 ppm                    | Not to be exceeded more than once per year                                                |

**Table S9.** USA AQI levels and concentration pollutants breakpoints.

| Values of AQI | Levels of Concern              | of | CO (ppm) 8-hour | SO <sub>2</sub> (ppb) 1-hour | NO <sub>2</sub> (ppb) 1-hour | PM <sub>2.5</sub> (µg/m <sup>3</sup> ) 24-hour | PM <sub>10</sub> (µg/m <sup>3</sup> ) 24-hour | O <sub>3</sub> (ppm) 8-hour | O <sub>3</sub> (ppm) 1-hour |
|---------------|--------------------------------|----|-----------------|------------------------------|------------------------------|------------------------------------------------|-----------------------------------------------|-----------------------------|-----------------------------|
| 0 - 50        | Good                           |    | 0.0 - 4.4       | 0 - 35                       | 0 - 53                       | 0.0 - 12.0                                     | 0 - 54                                        | 0.000-0.054                 |                             |
| 51- 100       | Moderate                       |    | 4.5 - 9.4       | 36 - 75                      | 54 - 100                     | 12.1- 35.4                                     | 55 - 154                                      | 0.055 - 0,070               |                             |
| 101- 150      | Unhealthy for Sensitive Groups |    | 9.5 - 12.4      | 76 - 185                     | 101- 360                     | 35.5 - 55.4                                    | 155 - 254                                     | 0.071- 0,085                | 0.125 - 0,164               |

|           |                |                |                 |                |                     |              |                  |                  |
|-----------|----------------|----------------|-----------------|----------------|---------------------|--------------|------------------|------------------|
| 151- 200  | Unhealthy      | 12.5 -<br>15.4 | (186 -<br>304)  | 361- 649       | (55.5 -<br>150.4)   | 255 -<br>354 | 0.086 -<br>0,105 | 0.165 -<br>0,204 |
| 201 - 300 | Very unhealthy | 15.5 -<br>30.4 | (305 -<br>604)  | 650 -<br>1249  | (150.5 -<br>-250.4  | 355 -<br>424 | 0.106 -<br>0,200 | 0.205 -<br>0,404 |
| 301- 400  | Hazardous      | 30.5 -<br>40.4 | (605 -<br>804)  | 1250 -<br>1649 | (250.5 -<br>(350.4) | 425 -<br>504 |                  | 0.405 -<br>0.504 |
| 401 - 500 | Hazardous      | 40.5 -<br>50.4 | (805 -<br>1004) | 1650 -<br>2049 | (350.5 -<br>500.4)  | 505 -<br>604 |                  | 0.505 -<br>0.604 |

**Table S10.** USA EPA AQI health messages.

| <b>AQI Value</b> | <b>Health Message</b>                                                                                                  |
|------------------|------------------------------------------------------------------------------------------------------------------------|
| <b>0-50</b>      | None                                                                                                                   |
| <b>51-100</b>    | Unusually sensitive people should reduce prolonged or heavy exertion                                                   |
| <b>101-150</b>   | Sensitive people should reduce prolonged or heavy exertion                                                             |
| <b>151-200</b>   | Sensitive people should reduce prolonged or heavy exertion; general public should reduce prolonged or heavy exertion.  |
| <b>201-300</b>   | Sensitive groups should avoid all physical activity outdoors; general public should avoid prolonged or heavy exertion. |
| <b>301-500</b>   | Everyone should avoid all physical activity outdoors                                                                   |

## CANADA

**Table S11.** National Ambient Air Quality Objectives & Guidelines in Canada.

| <b>Pollutant</b>                   | <b>Averaging Time</b> | <b>Maximum Desirable Level</b> | <b>Maximum Acceptable Level</b> | <b>Maximum Tolerable Level</b> |
|------------------------------------|-----------------------|--------------------------------|---------------------------------|--------------------------------|
| Sulphur dioxide (SO <sub>2</sub> ) | annual                | 11 ppb                         | 23 ppb                          |                                |
|                                    | 24 hours              | 57 ppb                         | 115 ppb                         | 306 ppb                        |
|                                    | 1 hour                | 172 ppb                        | 334 ppb                         |                                |
| Total susp. particulate (TSP)      | annual                | 60 µg/m <sup>3</sup>           | 70 µg/m <sup>3</sup>            |                                |
|                                    | 24 hours              |                                | 120 µg/m <sup>3</sup>           | 400 µg/m <sup>3</sup>          |
| Carbon Monoxide (CO)               | 8 hours               | 5 ppm                          | 13 ppm                          | 17 ppm                         |

|                                     |         |        |         |         |
|-------------------------------------|---------|--------|---------|---------|
| Nitrogen Dioxide (NO <sub>2</sub> ) | 1hour   | 13 ppm | 31 ppm  |         |
|                                     | annual  | 32 ppb | 53 ppb  |         |
|                                     | 24hours |        | 106 ppb | 160 ppb |
| Ozone (O <sub>3</sub> )             | 1hour   |        | 213 ppb | 532 ppb |
|                                     | annual  |        | 15 ppb  |         |

**Table S12.** Canadian Ambient Air Quality Standards (CAAQS).

| Pollutant                           | Averaging time | Standard (numerical value) |                      |                   | Statistical form of the standard                                                                     |
|-------------------------------------|----------------|----------------------------|----------------------|-------------------|------------------------------------------------------------------------------------------------------|
|                                     |                | Effective in 2015          | Effective in 2020    | Effective in 2025 |                                                                                                      |
| Ozone                               | 8-hour         | 63 ppb                     | 62 ppb               | 60 ppb            | The 3-year average of the annual 4th highest of the daily- maximum 8-hour average concentrations.    |
| Fine particulate matter (PM2.5)     | 24-hour        | 28 µg/m <sup>3</sup>       | 27 µg/m <sup>3</sup> | Under review      | The 3-year average of the annual 98th percentile of the daily 24-hour average concentrations.        |
|                                     | Annual         | 10.0 µg/m <sup>3</sup>     | 8.8 µg/m             | Under review      | The 3-year average of the annual average of the daily 24-hour average concentrations.                |
| Sulphur Dioxide (SO <sub>2</sub> )  | 1-hour         | --                         | 70 ppb               | 65 ppb            | The 3-year average of the annual 99th percentile of the daily-maximum 1-hour average concentrations. |
|                                     | Annual         | --                         | 5.0 ppb              | 4.0 ppb           | The arithmetic average over a single calendar year of all 1-hour average concentrations.             |
| Nitrogen Dioxide (NO <sub>2</sub> ) | 1-hour         | --                         | 60 ppb               | 42 ppb            | The 3-year average of the annual 98th percentile of the daily-maximum 1-hour average concentrations. |
|                                     | Annual         | --                         | 17.0 ppb             | 12.0 ppb          | The arithmetic average over a single calendar year of all 1-hour average concentrations.             |

**Table S13.** Classification breakpoints for the Canadian AQI.

| <b>Canadian AQI classes</b> | <b>CO (ppm)</b><br><b>1 hour</b> | <b>SO<sub>2</sub></b><br><b>(ppb)</b><br><b>1 hour</b> | <b>NO<sub>2</sub></b><br><b>(ppb)</b><br><b>1 hour</b> | <b>O<sub>3</sub></b><br><b>(ppb)</b><br><b>1 hour</b> | <b>PM<sub>2.5</sub> (µg/m<sup>3</sup>)</b><br><b>3 hour</b> | <b>TRS</b><br><b>*(ppb)</b><br><b>1 hour</b> |
|-----------------------------|----------------------------------|--------------------------------------------------------|--------------------------------------------------------|-------------------------------------------------------|-------------------------------------------------------------|----------------------------------------------|
| Very good (AQI: 0 - 15)     | 0-12.49                          | 0-79                                                   | 0-50                                                   | 0-23                                                  | 0-12                                                        | 0-5.49                                       |
| Good<br>(AQI: 16 -31)       | 12.50-22.49                      | 80-169                                                 | 51-110                                                 | 24-50                                                 | 13-22                                                       | 5.50-10.49                                   |
| Moderate (AQI: 32 - 49)     | 22.50-30.49                      | 170-250                                                | 111-200                                                | 51-80                                                 | 23-45                                                       | 10.50-<br>27.49                              |
| Poor<br>(AQI: 50 - 99)      | 30.50-49.49                      | 251-<br>1999                                           | 201-524                                                | 81-149                                                | 46-90                                                       | 27.50-<br>999.49                             |
| Very poor (AQI: 100+)       | ≥ 49.50                          | ≥ 2000                                                 | ≥ 525                                                  | ≥ 150                                                 | ≥ 91                                                        | ≥ 999.50                                     |

\*Total Reduced Sulphur (TRS)



**Table S14.** Canadian AQI health messages.

| Table 5.1: Canadian AQI health messages. |                                                                                         |                                                                   |                                                                                  |                                                                                                                                                                                                                                                                                                                                          |                                                                                                                                                                           |                                                              |
|------------------------------------------|-----------------------------------------------------------------------------------------|-------------------------------------------------------------------|----------------------------------------------------------------------------------|------------------------------------------------------------------------------------------------------------------------------------------------------------------------------------------------------------------------------------------------------------------------------------------------------------------------------------------|---------------------------------------------------------------------------------------------------------------------------------------------------------------------------|--------------------------------------------------------------|
| Category                                 | CO (1 hour)                                                                             | SO2 (1 hour)                                                      | NO2 (1 hour)                                                                     | O3 (1 hour)                                                                                                                                                                                                                                                                                                                              | PM2.5 (3 -hour)                                                                                                                                                           | TRS (1 hour)                                                 |
| Very good (AQI: 0 - 15)                  | No health effects are expected in healthy people.                                       | No health effects are expected in healthy people.                 | No health effects are expected in healthy people.                                | No health effects are expected in healthy people.                                                                                                                                                                                                                                                                                        | Sensitive populations may want to exercise caution.                                                                                                                       | No health effects are expected in healthy people.            |
| Good (AQI: 16 - 31)                      | No health effects are expected in healthy people.                                       | Damages some vegetation in combination with ozone.                | Slight odor.                                                                     | No health effects are expected in healthy people.                                                                                                                                                                                                                                                                                        | Sensitive populations may want to exercise caution.                                                                                                                       | Slight odor.                                                 |
| Moderate (AQI: 32 - 49)                  | Blood chemistry changes but no noticeable impairment.                                   | Damages some vegetation.                                          | Odor.                                                                            | Respiratory irritation in sensitive people during vigorous exercise; people with heart/lung disorders at some risk; damage to very sensitive plants. Sensitive people may experience irritation when breathing and possible lung damage when physically active; people with heart/lung disorders at greater risk; damage to some plants. | People with respiratory disease at some risk.                                                                                                                             | Odor                                                         |
| Poor (AQI: 50 - 99)                      | Increased symptoms in smokers with heart disease.                                       | Odor; increasing vegetation damage.                               | Air smells and looks brown. Some increase in bronchial reactivity in asthmatics. | People with respiratory disease should limit prolonged exertion; general population at some risk.                                                                                                                                                                                                                                        | Strong Odor                                                                                                                                                               |                                                              |
| Very poor (AQI: 100+)                    | Increasing symptoms in non-smokers with heart disease; blurred vision; some clumsiness. | Increasing sensitivity for asthmatics and people with bronchitis. | Increasing sensitivity for asthmatics and people with bronchitis.                | Serious respiratory effects, even during light physical activity; people with heart/lung disorders at high risk; more vegetation damage.                                                                                                                                                                                                 | Serious respiratory effects even during light physical activity; people with heart disease, the elderly and children at high risk; increased risk for general population. | Severe odor; some people may experience nausea and headache. |

---

MEXICO

**Table S15.** National Ambient Air Quality Standards in Mexico.

| Pollutant          | Standard  | Averaging Time | Form                                         |                                                                                                            |
|--------------------|-----------|----------------|----------------------------------------------|------------------------------------------------------------------------------------------------------------|
| Ozone              | 0.095 ppm | 1-hour         | Not to be exceeded over a period of one year |                                                                                                            |
| Carbon Monoxide    | 0.070 ppm | 8-hours        | 75th percentile over a period of one year    |                                                                                                            |
|                    | 11.00 ppm | 8-hours        | Not to be exceeded more than once per year   |                                                                                                            |
| Sulphur Dioxide    | 0.110 ppm | 24-hours       | Not to be exceeded more than once per year   |                                                                                                            |
| Nitrogen Dioxide   | 0.025 ppm | Annual         | Not to be exceeded                           |                                                                                                            |
|                    | 0.210 ppm | 1-hour         | Not to be exceeded more than once per year   |                                                                                                            |
| Particle Pollution | PM10      | 75 µg/m³       | 24-hours                                     | 75th percentile of each hour concentration per day. averaged over a period of one year                     |
|                    |           | 40 µg/m³       | Annual                                       | 75th percentile of each 24-hour concentration per trimester.averaged over one year (at least 3 trimesters) |
|                    | PM2.5     | 45 µg/m³       | 24-hours                                     | 75th percentile of each hour concentration per day. averaged over a period of one year                     |
|                    |           | 12 µg/m³       | Annual                                       | 75th percentile of each 24-hour concentration per trimester.averaged over one year (at least 3 trimesters) |
| Lead               | 1.5 µg/m³ | 3 months       | Not to be exceeded                           |                                                                                                            |

**Table S16.** Mexico (Aire y Salud) index classes and breakpoints.

| AQI<br>class | Air Quality   | NO <sub>2</sub><br>ppm<br>1-hour | SO <sub>2</sub><br>ppm<br>24-hour<br>mov ave | CO<br>ppm<br>8-hour<br>mov ave | O <sub>3</sub><br>ppm<br>1-hour | O <sub>3</sub><br>ppm<br>8-hour<br>mov ave | PM <sub>10</sub><br>µg/m <sup>3</sup><br>12-hour<br>mov ave | PM <sub>2.5</sub><br>µg/m <sup>3</sup><br>12-hour<br>mov ave |
|--------------|---------------|----------------------------------|----------------------------------------------|--------------------------------|---------------------------------|--------------------------------------------|-------------------------------------------------------------|--------------------------------------------------------------|
| 0-50         | Good          | 0.107                            | ≤ 0.008                                      | ≤8.75                          | ≤ 0.051                         | ≤ 0.051                                    | ≤ 50                                                        | ≤ 25                                                         |
| 51-100       | Acceptable    | 0.107-<br>0.210                  | 0.008-<br>0.110                              | 8.75-11.00                     | 0.051-<br>0.095                 | 0.051-<br>0.070                            | 50-75                                                       | 25-45                                                        |
| 101-150      | Bad           | 0.210-<br>0.230                  | 0.110 -<br>0.165                             | 11.00-<br>13.30                | 0.095-<br>0.135                 | 0.070-<br>0.092                            | 75-155                                                      | 45-79                                                        |
| 151-200      | Very Bad      | 0.230-<br>0.250                  | 0.165-<br>0.220                              | 13.30-<br>15.50                | 0.135-<br>0.175                 | 0.092-<br>0.114                            | 155-235                                                     | 79-147                                                       |
| >201         | Extremely bad | >0.250                           | >0.220                                       | >15.50                         | > 0.175                         | > 0.114                                    | >235                                                        | >147                                                         |

## ARGENTINA

**Table S17.** Limit values for the main pollutants in the city of Buenos Aires (GCABA, 2006) and WHO guidelines (2005).

| Pollutant | Averaging time | CABA              |       | WHO               |      |
|-----------|----------------|-------------------|-------|-------------------|------|
|           |                | µg m <sup>3</sup> | ppb   | µg m <sup>3</sup> | ppb  |
| PM10      | 24 hours       | 150               |       | 50                |      |
|           | 1 year         | 50                |       | 20                |      |
| PM2.5     | 24 hours       | 65                |       | 25                |      |
|           | 1 year         | 15                |       | 10                |      |
| O3        | 1 hour         | 235               | 120   |                   |      |
|           | 8 hours        | 157               | 80    | 100               | 51   |
| NO2       | 1 hour         | 376               | 200   | 200               | 106  |
|           | 1 year         | 100               | 53    | 40                | 21   |
| SO2       | 3 hours        | 1300              | 500   |                   |      |
|           | 24 hours       | 365               | 140   | 20                | 8    |
| CO        | 1 year         | 80                | 30    |                   |      |
|           | 1 hour         | 40000             | 35000 | 30000             | 2625 |
| Pb        | 8 hours        | 10000             | 9000  | 10000             | 9000 |
|           | 3 months       | 1.5               |       |                   |      |
|           | 1 year         |                   |       | 0.5               |      |

**Table S18.** Classification breakpoints of the Índice de Calidad de Aire (ICA) in Argentina.

| ICA categories                 | ICA rank | Meaning                                                                                                                                                                                        |
|--------------------------------|----------|------------------------------------------------------------------------------------------------------------------------------------------------------------------------------------------------|
| Good                           | 0-50     | Air quality is considered satisfactory and air pollution presents little or no risk.                                                                                                           |
| Moderate                       | 51-100   | Air quality is acceptable but for some pollutants there could be a moderate concern for the health of a very small group of people who are exceptionally sensitive to environmental pollution. |
| Unhealthy for sensitive groups | 101-150  | Members of sensitive groups may experience health effects. It probably won't affect people in general.                                                                                         |
| Unhealthy                      | 151-200  | Everyone can begin to have health effects, and members of sensitive groups may have more serious effects.                                                                                      |
| Very Unhealthy                 | 201-300  | Health warnings of emergency conditions. The whole population is more likely to be affected.                                                                                                   |
| Dangerous                      | 301-500  | Health alert: everyone can suffer more serious health effects.                                                                                                                                 |

Note: Values above 500 are considered above the Air Quality Index (ICA).

## BOLIVIA

**Table S19.** Limit values for the main pollutants in Bolivia.

| Pollutants                  | Concentration         | Statistical parameter and Averaging time |
|-----------------------------|-----------------------|------------------------------------------|
| Carbon Monoxide             | 10 mg/m <sup>3</sup>  | 8 hours                                  |
|                             | 10 mg/m <sup>3</sup>  | 1 hour                                   |
| Sulphur dioxide             | 80 µg/m <sup>3</sup>  | year                                     |
|                             | 365 µg/m <sup>3</sup> | 24 hours                                 |
|                             | 150 µg/m <sup>3</sup> | 24 hours                                 |
|                             | 400 µg/m <sup>3</sup> | 1 hour                                   |
| Total suspended particulate | 260 µg/m <sup>3</sup> | 24 hours                                 |
|                             | 75 µg/m <sup>3</sup>  | Geometric Average; year                  |
| PM10                        | 150 µg/m <sup>3</sup> | 24 hours                                 |
|                             | 50 µg/m <sup>3</sup>  | Geometric Average; year                  |
| Ozone                       | 236 µg/m <sup>3</sup> | Maximum average; 1 hour                  |
| Lead                        | 1.5 µg/m <sup>3</sup> | 3 months                                 |

Where not specified, the parameter is the arithmetic mean.

Source: D.S. 24176 RMCA 08/12/1995 (Anexo 1).

**Table S20.** Air quality index classes and prevention indications in Bolivia.

| <b>AQI Category</b> | <b>Index Value</b> | <b>Risk</b> | <b>Meaning and Prevention Actions</b>                                                                                                                                                                              |
|---------------------|--------------------|-------------|--------------------------------------------------------------------------------------------------------------------------------------------------------------------------------------------------------------------|
| Good                | 1-50               | Very low    | The air quality is considered satisfactory, and no health risks are present. No prevention actions are required.                                                                                                   |
| Regular             | 51-100             | Low         | The air quality is acceptable, without restrictions few people of very susceptible health classes have a moderate risk.                                                                                            |
| Bad                 | 101-150            | Moderate    | People of health risk groups may have some health effects. Indications: Avoid open-air areas, consider wearing masks. General population is unlikely affected.                                                     |
| Very bad            | 151-300            | Bad         | General population may begin experiencing health effects, whereas people of health risk groups may have strong health effects. Indications: Avoid open-air areas, consider wearing masks, avoid physical exercise. |
| Extremely bad       | >300               | Very bad    | Health Alert: General population may experience more serious health effects. It is recommended not to expose to open air, stay inside.                                                                             |

Risk groups: Children up to 5 years, pregnant women, elderly people and people with respiratory or cardiovascular diseases.

## BRAZIL

**Table S21.** Brazilian NAQS, ad-interim targets set in 2018. Values set in 1990 are also indicated.

| <b>Pollutant</b>  | <b>Averaging time</b> | <b>Mean concentration (µg/m³)</b> |             |             |             |                  |
|-------------------|-----------------------|-----------------------------------|-------------|-------------|-------------|------------------|
|                   |                       | <b>1990 NAQS</b>                  | <b>IT-1</b> | <b>IT-2</b> | <b>IT-3</b> | <b>2018 NAQS</b> |
| PM <sub>10</sub>  | year                  | 50                                | 40          | 35          | 30          | 20               |
|                   | 24-hours              | 150                               | 120         | 100         | 15          | 50               |
| PM <sub>2.5</sub> | year                  |                                   | 20          | 17          | 15          | 10               |
|                   | 24-hours              |                                   | 60          | 50          | 37          | 25               |
| O <sub>3</sub>    | 8-hours               |                                   | 140         | 130         | 120         | 100              |
|                   | 1-hour                | 160                               |             |             |             |                  |
| NO <sub>2</sub>   | year                  | 100                               | 60          | 50          | 45          | 40               |
|                   | 1-hour                | 320                               | 260         | 240         | 220         | 200              |
| SO <sub>2</sub>   | year                  | 80                                | 40          | 30          | 20          |                  |
|                   | 24-hours              | 365                               | 125         | 50          | 30          | 20               |
| CO                | 8-hours               | 9                                 |             |             |             | 9                |
| Pb                | year                  |                                   |             |             |             | 0.5              |
| TSPM              |                       | 240                               |             |             |             | 240              |

**Table S22.** Brazilian Limits for AQI determined in Resolution Number 491 (2018) and values used by SMAC and CETESB.

|                                                          | PM <sub>10</sub>     | PM <sub>2.5</sub>    | O <sub>3</sub>       | CO       | NO <sub>2</sub>      | SO <sub>2</sub>      |
|----------------------------------------------------------|----------------------|----------------------|----------------------|----------|----------------------|----------------------|
|                                                          | (µg m <sup>3</sup> ) | (µg m <sup>3</sup> ) | (µg m <sup>3</sup> ) | (ppm)    | (µg m <sup>3</sup> ) | (µg m <sup>3</sup> ) |
|                                                          | (24-hour)            | (24-hour)            | (1 hour)             | (8-hour) | (1 hour)             | (24-hour)            |
| AQI limits (2018 Brazilian NAQS (Resolution Number 491)) |                      |                      |                      |          |                      |                      |
| Good (0-40)                                              | 0-50                 |                      | 0-100                | 0-9      | 0-200                | 0-20                 |
| AQI limits (SMAC)                                        |                      |                      |                      |          |                      |                      |
| Good (0-50)                                              | 0-50                 |                      | 0-80                 | 0-4      | 0-100                | 0-80                 |
| Regular (51-100)                                         | 51-150               |                      | 81- 160              | 4.1-9    | 101-320              | 81-365               |
| Inadequate/unhealthy (101-200)                           | 151-250              |                      | 161-200              | 9.1-15   | 321 -1130            | 366-800              |
| Bad (201-300)                                            | 251-420              |                      | 201-800              | 15.1-30  | 1131-2260            | 801-1600             |
| Very Bad (>300)                                          | >420                 |                      | >800                 | >30      | >2260                | >1600                |
| AQI limits (CETESB)                                      |                      |                      |                      |          |                      |                      |
| Good (0-40)                                              | 0-50                 | 0-25                 | 0-100                | 0-9      | 0-200                | 0-20                 |
| Moderate (41-80)                                         | 50-100               | 25-50                | 100-130              | 9-11     | 200-240              | 20-40                |
| Bad (81-120)                                             | 100-150              | 50-75                | 130-160              | 11-13    | 240-320              | 40-365               |
| Very Bad (121-200)                                       | 150-250              | 75-125               | 160-200              | 13-15    | 320-1130             | 365-800              |
| Extremely Bad (>200)                                     | 250-600              | 125-300              | 200-800              | 15-50    | 1130-3750            | 800-2620             |

SMAC: Municipal Department of the Environment; CETESB: São Paulo State Environmental Agency.

## CHILE

**Table S23.** Air quality standards approved by CONAMA (25/04/2001) in Chile.

| <b>Pollutant</b>                    | <b>Standard<br/>(<math>\mu\text{g}/\text{m}^3</math>)</b> | <b>Averaging Time</b>                          |
|-------------------------------------|-----------------------------------------------------------|------------------------------------------------|
| PM10 <sup>1</sup>                   | 150                                                       | 24-hour*                                       |
|                                     | 50                                                        | year (average of three consecutive years)      |
| Sulphur dioxide (SO <sub>2</sub> )  | 250                                                       | 24-hour (average of three consecutive years)** |
|                                     | 80                                                        | year (average of three consecutive years)      |
| Ozone (O <sub>3</sub> )             | 120                                                       | 8-hour (average of three consecutive years)**  |
| Carbon Monoxide (CO)                | 30                                                        | 1-hour (of three consecutive years)**          |
|                                     | 10                                                        | 8-hour (of three consecutive years)**          |
| Nitrogen dioxide (NO <sub>2</sub> ) | 400                                                       | 1-hour (of three consecutive years)**          |
|                                     | 100                                                       | year (average of three consecutive years)      |
| Lead (Pb) <sup>2</sup>              | 0.5                                                       | year (average of two consecutive years)        |

<sup>1</sup>DS 59/1998 and DS 45/2002<sup>2</sup>DS 136/2000

\* 98th Percentile

\*\* 99th Percentile

**Table S24.** Levels that define critical episodes of contamination in Chile.

|                | <b>PM<sub>10</sub></b>                       | <b>O<sub>3</sub></b>                         |                                                             | <b>NO<sub>2</sub></b>                        | <b>CO</b>                                  |
|----------------|----------------------------------------------|----------------------------------------------|-------------------------------------------------------------|----------------------------------------------|--------------------------------------------|
| <b>Levels</b>  | <b>(<math>\mu\text{g}/\text{m}^3</math>)</b> | <b>(<math>\mu\text{g}/\text{m}^3</math>)</b> | <b>SO<sub>2</sub> (<math>\mu\text{g}/\text{m}^3</math>)</b> | <b>(<math>\mu\text{g}/\text{m}^3</math>)</b> | <b>(<math>\text{mg}/\text{m}^3</math>)</b> |
| Averaging time | 24-hours                                     | 1-hour                                       | 1-hour                                                      | 1-hour                                       | 8-hours                                    |
| Level 1        | 195-239                                      | 400-790                                      | 1962-2615                                                   | 1130-2259                                    | 17-33                                      |
| Level 2        | 240-329                                      | 800-999                                      | 2616-3923                                                   | 2260-2999                                    | 34-39                                      |
| Level 3        | ≥330                                         | ≥1000                                        | ≥3924                                                       | ≥3000                                        | ≥40                                        |

**Table S25.** Classes of the ICAP index in Chile.

| <b>ICAP</b> |           | <b>Category</b> | <b>PM10<br/>(<math>\mu\text{g}/\text{m}^3</math>)</b> | <b>Level</b> | <b>State</b> |
|-------------|-----------|-----------------|-------------------------------------------------------|--------------|--------------|
| 0-100       | Good      | 0               | 0                                                     | 0            |              |
| 101-200     | Regular   | 100             | 150                                                   | 0            |              |
| 201-300     | Bad       | 200             | 195                                                   | 1            | Alert        |
| 301-400     | Critical  | 300             | 240                                                   | 2            | Preemergency |
| 401-500     | Dangerous | 400             | 285                                                   | 2            | Preemergency |
| >501        | Excessive | 500             | 330                                                   | 3            | Emergency    |

## COLOMBIA

**Table S26.** Maximum acceptable level of criteria air pollutants in Colombia.

| <b>Pollutant</b>  | <b>Maximum acceptable level<br/>(<math>\mu\text{g}/\text{m}^3</math>)</b> | <b>Averaging period</b> |
|-------------------|---------------------------------------------------------------------------|-------------------------|
| PM <sub>10</sub>  | 50                                                                        | year                    |
|                   | 75*                                                                       | 24-hour                 |
| PM <sub>2.5</sub> | 25                                                                        | year                    |
|                   | 37*                                                                       | 24-hour                 |
| SO <sub>2</sub>   | 50                                                                        | 24-hour                 |
|                   | 100                                                                       | 1-hour                  |
| NO <sub>2</sub>   | 60                                                                        | year                    |
|                   | 200                                                                       | 1-hour                  |
| O <sub>3</sub>    | 100                                                                       | 8-hour                  |
| CO                | 5                                                                         | 8-hour                  |
|                   | 35000                                                                     | 1-hour                  |

\* Limit values in force from 01/01/2018 replacing the former (respectively of 100 and 50  $\mu\text{g}/\text{m}^3$  for PM<sub>10</sub> and PM<sub>2.5</sub>).

**Table S27.** Maximum acceptable level of toxic air pollutants in Colombia.

| <b>Pollutants</b> | <b>Maximum acceptable level (<math>\mu\text{g}/\text{m}^3</math>)</b> | <b>Averaging time</b> |
|-------------------|-----------------------------------------------------------------------|-----------------------|
| Benzene           | 5                                                                     | year                  |
| Lead              | 0.5                                                                   | year                  |
| Cadmium           | 0.005                                                                 | year                  |
| Mercury           | 1                                                                     | year                  |
| Toluene           | 260                                                                   | 1 week                |
|                   | 1000                                                                  | 30 minutes            |
| Nickel            | 0.180                                                                 | year                  |
| Benzo(a)pyrene    | 0.001                                                                 | year                  |



**Table S28.** Indice de Calidad del Aire warning messages and breakpoints in Colombia.

| Indice de Calidad del Aire |        |                                                                      | ICA Breakpoints                                  |                                                   |                                   |                                                |                                                |                                               |                                               |
|----------------------------|--------|----------------------------------------------------------------------|--------------------------------------------------|---------------------------------------------------|-----------------------------------|------------------------------------------------|------------------------------------------------|-----------------------------------------------|-----------------------------------------------|
| ICA                        | Colour | Class                                                                | PM <sub>10</sub><br>µg/m <sup>3</sup><br>24-hour | PM <sub>2.5</sub><br>µg/m <sup>3</sup><br>24-hour | CO<br>µg/m <sup>3</sup><br>8-hour | SO <sub>2</sub><br>µg/m <sup>3</sup><br>1-hour | NO <sub>2</sub><br>µg/m <sup>3</sup><br>1-hour | O <sub>3</sub><br>µg/m <sup>3</sup><br>8-hour | O <sub>3</sub><br>µg/m <sup>3</sup><br>1-hour |
| 0-50                       | Green  | Buena (Good)                                                         | 0-54                                             | 0-12                                              | 0 - 5094                          | 0 -93                                          | 0-100                                          | 0 -106                                        | .....                                         |
| 51-100                     | Yellow | Aceptable (Acceptable)                                               | 55-154                                           | 13-37                                             | 5095 - 10819                      | 94 - 197                                       | 101- 189                                       | 107- 138                                      | .....                                         |
| 101-150                    | Orange | Dañina a la salud de Grupos Sensibles (Harmful for sensitive groups) | 155-254                                          | 38 -55                                            | 10820 - 14254                     | 198- 486                                       | 190- 677                                       | 139- 167                                      | 245 - 323                                     |
| 151 - 200                  | Red    | Dañina a la salud (Harmful for health)                               | 255-354                                          | 56-150                                            | 14255- 17688                      | 487- 797                                       | 678- 1221                                      | 168- 207                                      | 324 - 401                                     |
| 201-300                    | Purple | Muy dañina a la salud (Very Harmful for health)                      | 355-424                                          | 151-250                                           | 17689- 34862                      | 798- 1583                                      | 1222- 2349                                     | 208- 393                                      | 402 - 794                                     |
| 301-500                    | Maroon | Peligrosa (Dangerous)                                                | 425-604                                          | 251- 500                                          | 34863- 57703                      | 1584- 2629                                     | 2350- 3853                                     | 394                                           | 795 - 1185                                    |

## PERU

**Table S29.** Peruvian Air quality standards set by Supreme Decree N° 003-2017-MINAM074-2001-PCM.

| Pollutant                                | Averaging time | Value (µg/m <sup>3</sup> ) | Evaluation Criteria           |
|------------------------------------------|----------------|----------------------------|-------------------------------|
| Benzene (C <sub>6</sub> H <sub>6</sub> ) | Year           | 2                          | Yearly average                |
| Sulphur dioxide (SO <sub>2</sub> )       | 24-hours       | 250                        | not more than 7 times a year  |
| Nitrogen dioxide (NO <sub>2</sub> )      | 1-hour         | 200                        | not more than 24 times a year |
|                                          | Year           | 100                        | Yearly average                |
| PM <sub>2.5</sub>                        | 24-hours       | 50                         | not more than 7 times a year  |
|                                          | Year           | 25                         | Yearly average                |
| PM <sub>10</sub>                         | 24-hours       | 100                        | not more than 7 times a year  |
|                                          | Year           | 50                         | Yearly average                |
| Total Gaseous Mercury (Hg)*              | 24-hours       | 2                          | Not to be exceeded            |
| Carbon Monoxide (CO)                     | 1-hour         | 30000                      | not more than once a year     |
|                                          | 8-hours        | 10000                      | Rolling average               |

|                                      |          |     |                                                        |
|--------------------------------------|----------|-----|--------------------------------------------------------|
| Ozone (O <sub>3</sub> )              | 8-hours  | 100 | Maximum daily average<br>not more than 24 times a year |
| Lead (Pb)                            | Month    | 1.5 | not more than 4 times a year                           |
|                                      | Year     | 0.5 | Monthly average                                        |
| Hydrogen Sulphide (H <sub>2</sub> S) | 24-hours | 150 |                                                        |

\* The environmental quality standard for Total Gaseous Mercury will come into effect the day after the publication of the National Protocol for Monitoring the Environmental Quality of the Air, in accordance with the provisions of the Seventh Final Complementary Provision of this Supreme Decree.

**Table S30.** Classification breakpoints for the Índice de Calidad del Aire (INCA) in Peru.

| Pollutant         | Concentrations Range<br>(µg/m3) | Averaging period | Equation                |
|-------------------|---------------------------------|------------------|-------------------------|
| PM <sub>10</sub>  |                                 |                  |                         |
| 0-50              | 0-75                            | 24-hour          | I(PM10)=[PM10]*100/150  |
| 51-100            | 76-150                          |                  |                         |
| 101-167           | 151-250                         |                  |                         |
| >167              | >250                            |                  |                         |
| PM <sub>2.5</sub> |                                 |                  |                         |
| 0-50              | 0-12.5                          | 24-hour          | I(PM2.5)=[PM2.5]*100/25 |
| 51-100            | 12.6-25                         |                  |                         |
| 101-500           | 25.-125                         |                  |                         |
| >500              | >125                            |                  |                         |
| SO <sub>2</sub>   |                                 |                  |                         |
| 0-50              | 0-10                            | 24-hour          | I(SO2)=[SO2]*100/20     |
| 51-100            | 11-20                           |                  |                         |
| 101-625           | 21-500                          |                  |                         |
| >625              | >500                            |                  |                         |
| NO <sub>2</sub>   |                                 |                  |                         |
| 0-50              | 0-100                           | 1 -hour          | I(NO2)=[NO2]*100/200    |
| 51-100            | 101-200                         |                  |                         |
| 101-150           | 201-300                         |                  |                         |
| >150              | >300                            |                  |                         |
| CO                |                                 |                  |                         |
| 0-50              | 0-5049                          | 8-hours          | I(CO)=[CO]*100/10000    |
| 51-100            | 5050-10049                      |                  |                         |
| 101-625           | 10050-15049                     |                  |                         |
| >625              | >15050                          |                  |                         |

| <b>O<sub>3</sub></b>  |          |          |                                                |
|-----------------------|----------|----------|------------------------------------------------|
| 0-50                  | 0-60     | 8-hours  | I(O <sub>3</sub> )=[O <sub>3</sub> ]*100/120   |
| 51-100                | 61-120   |          |                                                |
| 101-175               | 121-210  |          |                                                |
| >175                  | >210     |          |                                                |
| <b>H<sub>2</sub>S</b> |          |          |                                                |
| 0-50                  | 0-75     | 24-hours | I(H <sub>2</sub> S)=[H <sub>2</sub> S]*100/150 |
| 51-100                | 76-150   |          |                                                |
| 101-1000              | 151-1500 |          |                                                |
| >1000                 | >1500    |          |                                                |

**Table S31.** Classification of the Índice de Calidad del Aire (INCA) and related warning messages in Peru.

| <b>Classification</b>                        |    | <b>Warning Messages</b>                                                                                                                                                                                                  | <b>Recommendations</b>                                                                                                                         |
|----------------------------------------------|----|--------------------------------------------------------------------------------------------------------------------------------------------------------------------------------------------------------------------------|------------------------------------------------------------------------------------------------------------------------------------------------|
| Buena<br>(Good)                              |    | The air quality is satisfactory and doesn't represent a risk for the health.                                                                                                                                             | The air quality is acceptable and complies with the EC. Outdoor activities may be carried out.                                                 |
| Moderada<br>(Moderate)                       |    | Sensitive population (children, elderly people, pregnant women, people with respiratory and cardiovascular illnesses) could experience some health problems.                                                             | The air quality is acceptable and complies with the EC. Outdoor activities may be carried out with some restrictions for sensitive population. |
| Mala<br>(Bad)                                |    | Sensitive population may experience some health problems. General population might be affected.                                                                                                                          | Keep informed on air quality. Avoid outdoor exercise and activities in open air.                                                               |
| Umbral de<br>cuidado<br>(Alert<br>Threshold) | de | The pollutant concentration may cause health effects on general population and serious effects on sensitive population (children, elderly people, pregnant women, people with respiratory and cardiovascular illnesses). | Refer to Health Authority which declares Alert levels according to the current legislation.                                                    |

## URUGUAY

**Table S32.** Uruguayan Air quality standards set by Regulation 2020-14-1-0000343 till 31<sup>st</sup> December 2023.

| <b>Pollutant</b>  | <b>Averaging time</b> | <b>Limit Value (µg/m<sup>3</sup>)</b> | <b>Tolerance not to be exceeded</b>                        |
|-------------------|-----------------------|---------------------------------------|------------------------------------------------------------|
| CO                | 1-hour                | 30000                                 |                                                            |
|                   | Max 8-hour mov        | 10000                                 |                                                            |
| NO <sub>2</sub>   | 1-hour                | 200                                   | 260 µg/m <sup>3</sup> for 18 hours in the year             |
|                   | 1 year                | 40                                    |                                                            |
| O <sub>3</sub>    | Max 8-hour mov        | 100                                   | 160 µg/m <sup>3</sup> for 25 days on a three years average |
| SO <sub>2</sub>   | 1-hour                | 300                                   | 450 µg/m <sup>3</sup> 24 hours in the year                 |
|                   | 24-hour               | 50                                    | 125 µg/m <sup>3</sup> for 3 days in the year               |
| PM <sub>2.5</sub> | 24-hour               | 35                                    | 54 µg/m <sup>3</sup> for 30 days in the year               |
|                   | 1 year                | 25                                    |                                                            |

|                       |            |     |                                                                |
|-----------------------|------------|-----|----------------------------------------------------------------|
| PM <sub>10</sub>      | 24-hour    | 75  | 112 µg/m <sup>3</sup> for 15 days in the year                  |
|                       | 1 year     | 30  |                                                                |
| Pb                    | 1 year     | 0.5 |                                                                |
| Total reduced sulphur | 30 minutes | 10  | 15 µg/m <sup>3</sup> for 40 times (30 min average) in the year |
|                       | 24-hour    | 7   | 11 µg/m <sup>3</sup> for 10 days in the year                   |

**Table S33.** ICAire classification in Uruguay.

| Level   | Index Value | Classification          | Message                                                                      |
|---------|-------------|-------------------------|------------------------------------------------------------------------------|
| Level 1 | 0-25        | Muy Buena (Very good)   | Optimal air quality                                                          |
| Level 1 | 26-50       | Buena (Good)            | Situation favorable to all kind of activities                                |
| Level 2 | 51-100      | Aceptable (Acceptable)  | Air quality acceptable for the majority of people.                           |
| Level 3 | 101-200     | Inadecuada (Inadequate) | Appearance of nuisance in sensitive people.                                  |
| Level 4 | 201-300     | Mala (Bad)              | Appearance of nuisance and intolerance in people with respiratory illnesses. |
| Level 5 | 301-400     | Muy Mala (Very bad)     | Appearance of symptoms and intolerance in general population.                |

**Table S34.** Reference values employed in ICAire calculation in Uruguay.

| Level | PTS<br>(µg/m <sup>3</sup> )<br>24-hour | PM10<br>(µg/m <sup>3</sup> )<br>24-hour | Black<br>Smoke<br>(µg/m <sup>3</sup> )<br>24-hour | SO <sub>2</sub><br>(µg/m <sup>3</sup> )<br>24-hour | NO <sub>2</sub><br>(µg/m <sup>3</sup> )<br>1-hour | CO<br>(µg/m <sup>3</sup> )<br>8-hour | O <sub>3</sub><br>(µg/m <sup>3</sup> )<br>8-hour |
|-------|----------------------------------------|-----------------------------------------|---------------------------------------------------|----------------------------------------------------|---------------------------------------------------|--------------------------------------|--------------------------------------------------|
| 1     | 60                                     | 50                                      | 50                                                | 20                                                 | 40                                                | 4.5                                  | 80                                               |
| 2     | 100                                    | 75                                      | 75                                                | 50                                                 | 75                                                | 7                                    | 100                                              |
| 4     | 150                                    | 100                                     | 100                                               | 125                                                | 200                                               | 10                                   | 160                                              |
| 5     | 375                                    | 150                                     | 150                                               | 365                                                | 500                                               | 15                                   | 240                                              |
| 6     | 563                                    | 225                                     | 225                                               | 550                                                | 1130                                              | 22                                   | 540                                              |
| 7     | 845                                    | 340                                     | 340                                               | 825                                                | 2260                                              | 33                                   | 1080                                             |

## ASIA

### INDIA

**Table S35.** India's ambient air quality standards.

| Pollutant                     | Averaging time | Concentration                                  |                              |
|-------------------------------|----------------|------------------------------------------------|------------------------------|
|                               |                | Industrial, Residential, rural and other Areas | Ecologically Sensitive Areas |
| PM <sub>10</sub>              | 24-hour        | 100 µg/m <sup>3</sup>                          | 100 µg/m <sup>3</sup>        |
|                               | year           | 60 µg/m <sup>3</sup>                           | 60 µg/m <sup>3</sup>         |
| PM <sub>2.5</sub>             | 24-hour        | 60 µg/m <sup>3</sup>                           | 60 µg/m <sup>3</sup>         |
|                               | year           | 40 µg/m <sup>3</sup>                           | 40 µg/m <sup>3</sup>         |
| NO <sub>2</sub>               | 24-hour        | 80 µg/m <sup>3</sup>                           | 80 µg/m <sup>3</sup>         |
|                               | year           | 40 µg/m <sup>3</sup>                           | 30 µg/m <sup>3</sup>         |
| SO <sub>2</sub>               | 24-hour        | 80 µg/m <sup>3</sup>                           | 80 µg/m <sup>3</sup>         |
|                               | year           | 50 µg/m <sup>3</sup>                           | 20 µg/m <sup>3</sup>         |
| O <sub>3</sub>                | 1-hour         | 180 µg/m <sup>3</sup>                          | 180 µg/m <sup>3</sup>        |
|                               | 8-hour         | 100 µg/m <sup>3</sup>                          | 100 µg/m <sup>3</sup>        |
| CO                            | 1-hour         | 4 mg/m <sup>3</sup>                            | 4 mg/m <sup>3</sup>          |
|                               | 8-hour         | 2 mg/m <sup>3</sup>                            | 2 mg/m <sup>3</sup>          |
| Pb                            | 24-hour        | 1 µg/m <sup>3</sup>                            | 1 µg/m <sup>3</sup>          |
|                               | year           | 0.50 µg/m <sup>3</sup>                         | 0.50 µg/m <sup>3</sup>       |
| NH <sub>3</sub>               | 24-hour        | 400 µg/m <sup>3</sup>                          | 400 µg/m <sup>3</sup>        |
|                               | year           | 100 µg/m <sup>3</sup>                          | 100 µg/m <sup>3</sup>        |
| BaP                           | year           | 1 ng/m <sup>3</sup>                            | 1 ng/m <sup>3</sup>          |
| C <sub>6</sub> H <sub>6</sub> | year           | 5 µg/m <sup>3</sup>                            | 5 µg/m <sup>3</sup>          |
| As                            | year           | 6 ng/m <sup>3</sup>                            | 6 ng/m <sup>3</sup>          |
| Ni                            | year           | 20 ng/m <sup>3</sup>                           | 20 ng/m <sup>3</sup>         |

Source: The Gazette of India, 2009; CPCB, 2014.

**Table S36.** India's AQI classification.

| AQI category<br>(Range)  | PM <sub>10</sub><br>(µg/m <sup>3</sup> )<br>24-hour | PM <sub>2.5</sub><br>(µg/m <sup>3</sup> )<br>24-hour | NO <sub>2</sub><br>(µg/m <sup>3</sup> )<br>24-hour | O <sub>3</sub><br>(µg/m <sup>3</sup> )<br>8-hour | CO<br>(mg/m <sup>3</sup> )<br>8-hour | SO <sub>2</sub><br>(µg/m <sup>3</sup> )<br>24-hour | NH <sub>3</sub><br>(µg/m <sup>3</sup> )<br>24-hour | Pb<br>(µg/m <sup>3</sup> )<br>24-hour |
|--------------------------|-----------------------------------------------------|------------------------------------------------------|----------------------------------------------------|--------------------------------------------------|--------------------------------------|----------------------------------------------------|----------------------------------------------------|---------------------------------------|
| GOOD<br>(0-50)           | 0-50                                                | 0-30                                                 | 0-40                                               | 0-50                                             | 0-1.0                                | 0-40                                               | 0-200                                              | 0-0.5                                 |
| SATISFACTORY<br>(51-100) | 51-100                                              | 31-60                                                | 41-80                                              | 51-100                                           | 1.1-2.0                              | 41-80                                              | 201-400                                            | 0.6-1.0                               |
| MODERATE<br>(101-200)    | 101-250                                             | 61-90                                                | 81-180                                             | 101-168                                          | 2.1-10                               | 81-380                                             | 401-800                                            | 1.1-2.0                               |

|                        |         |         |         |         |         |          |           |         |
|------------------------|---------|---------|---------|---------|---------|----------|-----------|---------|
| POOR<br>(201-300)      | 251-350 | 91-120  | 181-280 | 169-208 | 10.1-17 | 381-800  | 801-1200  | 2.1-3.0 |
| VERY POOR<br>(301-400) | 351-430 | 121-250 | 281-400 | 209-748 | 17.1-34 | 801-1600 | 1201-1800 | 3.1-3.5 |
| SEVERE<br>(401-500)    | 430+    | 250+    | 400+    | 748+    | 34+     | 1600+    | 1800+     | 3.5+    |

Source: CPCB, 2014 .

**Table S37.** India's AQI health statements.

| AQI                      | Associated Health Impacts                                                                                                                                                                      |
|--------------------------|------------------------------------------------------------------------------------------------------------------------------------------------------------------------------------------------|
| Good (0-50)              | Minimal Impact                                                                                                                                                                                 |
| Satisfactory<br>(51-100) | May cause minor breathing discomfort to sensitive people                                                                                                                                       |
| Moderate<br>(101-200)    | May cause breathing discomfort to the people with lung disease such as asthma and discomfort to people with heart disease, children and older adults                                           |
| Poor<br>(201-300)        | May cause breathing discomfort to people on prolonged exposure and discomfort to people with heart disease                                                                                     |
| Very Poor<br>(301-400)   | May cause respiratory illness to the people on prolonged exposure. Effect may be more pronounced in people with lung and heart diseases                                                        |
| Severe<br>(401-500)      | May cause respiratory effects even on healthy people and serious health impacts on people with lung/ heart diseases. The health impacts may be experienced even during light physical activity |

Source: CPCB, 2014.

**Table S38.** Information available for India.

| Information                                                                                                                                                                                                                                                                             |
|-----------------------------------------------------------------------------------------------------------------------------------------------------------------------------------------------------------------------------------------------------------------------------------------|
| <ul style="list-style-type: none"> <li>• AQI Status</li> <li>• AQI BULLETIN</li> <li>• ABOUT NATIONAL AIR QUALITY INDEX</li> <li>• HOW IS AQI CALCULATED</li> <li>• NATIONAL NETWORK</li> <li>• LIMITATIONS</li> <li>• BROAD GUIDELINES FOR PUBLIC</li> <li>• AQI CALCULATOR</li> </ul> |

REPUBLIC OF KOREA

**Table S39.** Republic of Korea's ambient air quality standards.

| Pollutant         | Averaging time | Concentration                 |
|-------------------|----------------|-------------------------------|
| PM <sub>10</sub>  | 24-hour        | 100 µg/m <sup>3</sup> or less |
|                   | year           | 50 µg/m <sup>3</sup> or less  |
| PM <sub>2.5</sub> | 24-hour        | 35 µg/m <sup>3</sup> or less  |
|                   | year           | 15 µg/m <sup>3</sup> or less  |
| NO <sub>2</sub>   | 1-hour         | 0.10 ppm or less              |
|                   | 24-hour        | 0.06 ppm or less              |
|                   | year           | 0.03 ppm or less              |
| SO <sub>2</sub>   | 1 hr           | 0.15 ppm or less              |
|                   | 24-hour        | 0.05 ppm or less              |
|                   | year           | 0.02 ppm or less              |
| O <sub>3</sub>    | 1-hour         | 0.1 ppm or less               |
|                   | 8-hour         | 0.06 ppm or less              |
| CO                | 1-hour         | 25 ppm or less                |
|                   | 8-hour         | 9 ppm or less                 |
| Pb                | year           | 0.5 µg/m <sup>3</sup> or less |
| Benzene           | year           | 5 µg/m <sup>3</sup> or less   |

**Table S40.** Republic of Korea's AQI classification.

| Description    |                  | SO <sub>2</sub><br>(ppm)<br>1-hour | CO<br>(ppm)<br>1-hour | O <sub>3</sub><br>(ppm)<br>1-hour | NO <sub>2</sub><br>(ppm)<br>1-hour | PM <sub>10</sub><br>(µg/m <sup>3</sup> )<br>24-hour | PM <sub>2.5</sub><br>(µg/m <sup>3</sup> )<br>24-hour |
|----------------|------------------|------------------------------------|-----------------------|-----------------------------------|------------------------------------|-----------------------------------------------------|------------------------------------------------------|
| AQI Values     |                  |                                    |                       |                                   |                                    |                                                     |                                                      |
| Good           | BP <sub>LO</sub> | 0                                  | 0                     | 0                                 | 0                                  | 0                                                   | 0                                                    |
| 0-50           | BP <sub>HI</sub> | 0.02                               | 2                     | 0.03                              | 0.03                               | 30                                                  | 15                                                   |
| Moderate       | BP <sub>LO</sub> | 0.021                              | 2.1                   | 0.031                             | 0.031                              | 31                                                  | 16                                                   |
| 51-100         | BP <sub>HI</sub> | 0.05                               | 9                     | 0.09                              | 0.06                               | 80                                                  | 35                                                   |
| Unhealthy      | BP <sub>LO</sub> | 0.051                              | 9.1                   | 0.091                             | 0.061                              | 81                                                  | 36                                                   |
| 101-250        | BP <sub>HI</sub> | 0.15                               | 15                    | 0.15                              | 0.2                                | 150                                                 | 75                                                   |
| Very unhealthy | BP <sub>LO</sub> | 0.151                              | 15.1                  | 0.151                             | 0.201                              | 151                                                 | 76                                                   |
| 251-500        | BP <sub>HI</sub> | 1                                  | 50                    | 0.6                               | 2                                  | 600                                                 | 500                                                  |

**Table S41.** Republic of Korea's AQI health statements.

| Values of CAQI | Health Effects                                                                         |
|----------------|----------------------------------------------------------------------------------------|
| Good<br>0-50   | A level that will not impact patients suffering from diseases related to air pollution |

|                        |                                                                                                                                                                          |
|------------------------|--------------------------------------------------------------------------------------------------------------------------------------------------------------------------|
| Moderate<br>51-100     | A level which may have a meager impact on patients in case of chronic exposure                                                                                           |
| Unhealthy<br>101-250   | A level that may have harmful impacts on patients and members of sensitive groups (children, aged or weak people), and also cause the general public unpleasant feelings |
| Very unhealthy 251-350 | A level which may have a serious impact on patients and members of sensitive groups in case of acute exposure, and that even the general public can be weakly affected   |
| Very unhealthy 351-500 | A level which may need to take emergency measures for patients and members of sensitive groups and have harmful impacts on the general public                            |

**Table S42.** Information available for Republic of Korea.

| Information                                                                                                                                                                                                                                                                                                                                                                               |
|-------------------------------------------------------------------------------------------------------------------------------------------------------------------------------------------------------------------------------------------------------------------------------------------------------------------------------------------------------------------------------------------|
| <ul style="list-style-type: none"> <li>• Hourly Trends (hourly, monthly, annual)</li> <li>• Air Quality Watch</li> <li>• Air Quality Calendar</li> <li>• Metropolitan Air Quality</li> <li>• Level of Local Air Quality</li> <li>• Station Information</li> <li>• Data Screening</li> <li>• Air Quality Standards</li> <li>• O3 Alert</li> <li>• Publications</li> <li>• Links</li> </ul> |



## CHINA

**Table S43.** China's National Air Quality Standards.

| Pollutant                 | Averaging time |        | Class 1                  | Class 2                  |
|---------------------------|----------------|--------|--------------------------|--------------------------|
| SO <sub>2</sub>           | 1-hour         |        | 150 µg/m <sup>3</sup>    | 500 µg/m <sup>3</sup>    |
|                           | 24-hour        |        | 50 µg/m <sup>3</sup>     | 150 µg/m <sup>3</sup>    |
|                           | year           |        | 20 µg/m <sup>3</sup>     | 60 µg/m <sup>3</sup>     |
| NO <sub>2</sub>           | 1-hour         |        | 200 µg/m <sup>3</sup>    | 200 µg/m <sup>3</sup>    |
|                           | 24-hour        |        | 80 µg/m <sup>3</sup>     | 80 µg/m <sup>3</sup>     |
|                           | year           |        | 40 µg/m <sup>3</sup>     | 40 µg/m <sup>3</sup>     |
| CO                        | 1-hour         |        | 10 mg/m <sup>3</sup>     | 10 mg/m <sup>3</sup>     |
|                           | 24-hour        |        | 4 mg/m <sup>3</sup>      | 4 mg/m <sup>3</sup>      |
| O <sub>3</sub>            | 1-hour         |        | 160 µg/m <sup>3</sup>    | 200 µg/m <sup>3</sup>    |
|                           | daily, maximum | 8-hour | 100 µg/m <sup>3</sup>    | 160 µg/m <sup>3</sup>    |
| PM <sub>10</sub>          | 24-hour        |        | 50 µg/m <sup>3</sup>     | 150 µg/m <sup>3</sup>    |
|                           | year           |        | 40 µg/m <sup>3</sup>     | 70 µg/m <sup>3</sup>     |
| PM <sub>2.5</sub>         | 24-hour        |        | 35 µg/m <sup>3</sup>     | 75 µg/m <sup>3</sup>     |
|                           | year           |        | 15 µg/m <sup>3</sup>     | 35 µg/m <sup>3</sup>     |
| Total Suspended Particles | 24-hour        |        | 120 µg/m <sup>3</sup>    | 300 µg/m <sup>3</sup>    |
|                           | year           |        | 80 µg/m <sup>3</sup>     | 200 µg/m <sup>3</sup>    |
| NO <sub>x</sub>           | 1-hour         |        | 250 µg/m <sup>3</sup>    | 250 µg/m <sup>3</sup>    |
|                           | 24-hour        |        | 100 µg/m <sup>3</sup>    | 100 µg/m <sup>3</sup>    |
|                           | year           |        | 50 µg/m <sup>3</sup>     | 50 µg/m <sup>3</sup>     |
| Lead (Pb)                 | seasonal       |        | 1 µg/m <sup>3</sup>      | 1 µg/m <sup>3</sup>      |
|                           | year           |        | 0.5 µg/m <sup>3</sup>    | 0.5 µg/m <sup>3</sup>    |
| Benzo(a)pyrene            | 24-hour        |        | 0.0025 µg/m <sup>3</sup> | 0.0025 µg/m <sup>3</sup> |
|                           | year           |        | 0.001 µg/m <sup>3</sup>  | 0.001 µg/m <sup>3</sup>  |

**Table S44.** China's AQI classification.

| IAQI | PM <sub>10</sub><br>(µg/m <sup>3</sup> )<br>24-hour | PM <sub>2.5</sub><br>(µg/m <sup>3</sup> )<br>24-hour | NO <sub>2</sub><br>(µg/m <sup>3</sup> )<br>24-hour | SO <sub>2</sub><br>(µg/m <sup>3</sup> )<br>24-hour | 1-h peak O <sub>3</sub><br>(µg/m <sup>3</sup> )<br>1-hour | 8-h peak O <sub>3</sub><br>(µg/m <sup>3</sup> )<br>8-hour | CO<br>(mg/m <sup>3</sup> )<br>24-hour |
|------|-----------------------------------------------------|------------------------------------------------------|----------------------------------------------------|----------------------------------------------------|-----------------------------------------------------------|-----------------------------------------------------------|---------------------------------------|
| 50   | 50                                                  | 35                                                   | 40                                                 | 50                                                 | 160                                                       | 100                                                       | 2                                     |
| 100  | 150                                                 | 75                                                   | 80                                                 | 150                                                | 200                                                       | 160                                                       | 4                                     |
| 150  | 250                                                 | 115                                                  | 180                                                | 475                                                | 300                                                       | 215                                                       | 14                                    |
| 200  | 350                                                 | 150                                                  | 280                                                | 800                                                | 400                                                       | 265                                                       | 24                                    |
| 300  | 420                                                 | 250                                                  | 565                                                | 1600                                               | 800                                                       | 800                                                       | 36                                    |
| 400  | 500                                                 | 350                                                  | 750                                                | 2100                                               | 1000                                                      |                                                           | 48                                    |
| 500  | 600                                                 | 500                                                  | 940                                                | 2620                                               | 1200                                                      |                                                           | 60                                    |

Source: Chen et al 2016 [27].

**Table S45.** Chinese Indicators for Air Quality Index.

| Air Quality Index (AQI) | Level of AQI | Categories of AQI  |
|-------------------------|--------------|--------------------|
| 0-50                    | level 1      | Excellent          |
| 51-100                  | level 2      | Good               |
| 101-150                 | level 3      | Slight pollution   |
| 151-200                 | level 4      | Moderate pollution |
| 201-300                 | level 5      | Heavy pollution    |
| >300                    | level 6      | Serious pollution  |

Source: Zhan, 2018 [28]

## THAILAND

**Table S46.** Thailand's ambient air quality standards.

| Pollutant         | Time period | Concentration                    |
|-------------------|-------------|----------------------------------|
| TSP               | 24-hour     | 330 µg/m <sup>3</sup>            |
|                   | year        | 100 µg/m <sup>3</sup>            |
| PM <sub>10</sub>  | 24-hour     | 120 µg/m <sup>3</sup>            |
|                   | year        | 50 µg/m <sup>3</sup>             |
| PM <sub>2.5</sub> | 24-hour     | 50 µg/m <sup>3</sup>             |
|                   | year        | 25 µg/m <sup>3</sup>             |
| SO <sub>2</sub>   | 1-hour      | 786 µg/m <sup>3</sup> (0.3 ppm)  |
|                   | 24-hour     | 314 µg/m <sup>3</sup> (0.12 ppm) |
|                   | year        | 105 µg/m <sup>3</sup> (0.04 ppm) |
| NO <sub>2</sub>   | 1-hour      | 320 µg/m <sup>3</sup> (0.17 ppm) |
|                   | year        | 56 µg/m <sup>3</sup> (0.03 ppm)  |
| O <sub>3</sub>    | 1-hour      | 200 µg/m <sup>3</sup> (0.10 ppm) |
|                   | 8-hour      | 140 µg/m <sup>3</sup> (0.07 ppm) |
| CO                | 1-hour      | 34.2 mg/m <sup>3</sup> (30 ppm)  |
|                   | 8-hour      | 10.3 mg/m <sup>3</sup> (9 ppm)   |
| Pb                | 1-month     | 1.5 µg/m <sup>3</sup>            |

Source: Pollution Control Department, 2002; EANET, 2020.

<https://documents1.worldbank.org/curated/en/710411468778515943/pdf/263950PAPER0English0Thailand0Env0Monitor.pdf>

[https://www.eanet.asia/wp-content/uploads/2020/04/12-Thailand\\_Factsheet\\_compressed.pdf](https://www.eanet.asia/wp-content/uploads/2020/04/12-Thailand_Factsheet_compressed.pdf)

**Table S47.** Thailand's AQI classification.

| AQI     | PM <sub>2.5</sub>    | PM <sub>10</sub>     | O <sub>3</sub> | CO            | NO <sub>2</sub> | SO <sub>2</sub> |
|---------|----------------------|----------------------|----------------|---------------|-----------------|-----------------|
|         | (µg/m <sup>3</sup> ) | (µg/m <sup>3</sup> ) | (ppb)          | (ppm)         | (ppb)           | (ppb)           |
|         | <i>24-hour</i>       | <i>24-hour</i>       | <i>8-hour</i>  | <i>8-hour</i> | <i>1-hour</i>   | <i>1-hour</i>   |
| 0-25    | 0-25                 | 0-50                 | 0-35           | 0-4.4         | 0-60            | 0-100           |
| 26-50   | 26-37                | 51-80                | 36-50          | 4.5-6.4       | 61-106          | 101-200         |
| 51-100  | 38-50                | 81-120               | 51-70          | 6.5-9.0       | 107-170         | 201-300         |
| 101-200 | 51-90                | 121-180              | 71-120         | 9.1-30.0      | 171-340         | 301-400         |
| ≥ 201   | ≥ 91                 | ≥ 181                | ≥ 121          | ≥ 30.1        | ≥ 341           | ≥ 401           |

Source: BangkokAirQuality, 2021 and Phruksahiran, 2021 [29]

**Table S48.** Thailand's AQI Health messages.

| AQI                                     | Associated Health Impacts                                                                                                                                                                                                                                                                                                                                                                                                                                                                                                      |
|-----------------------------------------|--------------------------------------------------------------------------------------------------------------------------------------------------------------------------------------------------------------------------------------------------------------------------------------------------------------------------------------------------------------------------------------------------------------------------------------------------------------------------------------------------------------------------------|
| Very good quality –<br>AQI 0-25         | Very good air quality suitable for outdoor activities and tourism<br>Good                                                                                                                                                                                                                                                                                                                                                                                                                                                      |
| Good quality –<br>AQI 26-50             | Good air quality can do outdoor activities and travel as usual                                                                                                                                                                                                                                                                                                                                                                                                                                                                 |
| Medium –<br>AQI 51-100                  | General people: can do outdoor activities as usual.<br>People who need special health care: If there are basic symptoms such as coughing, difficulty breathing, eye irritation, should reduce the duration of outdoor activities.                                                                                                                                                                                                                                                                                              |
| Began to affect health –<br>AQI 101-200 | General people: should monitor health If there are basic symptoms such as coughing, difficulty breathing, eye irritation, should reduce the duration of outdoor activities. Or use self-protection equipment if necessary.<br>People who need special health care: should reduce the duration of outdoor activities or use self-protection equipment if necessary If there are health symptoms such as coughing, dyspnea, eye inflammation, chest tightness, headache, irregular heartbeat, nausea, fatigue, consult a doctor. |
| Affecting health –<br>AQI > 201         | Everyone should avoid all kinds of outdoor activities. Avoid areas with high air pollution or use self-protection equipment if necessary<br>If there is a health condition, consult a doctor                                                                                                                                                                                                                                                                                                                                   |

## AUSTRALIA

**Table S49.** Australia's ambient air quality standards.

| Pollutant                            | Averaging period | Concentration          |
|--------------------------------------|------------------|------------------------|
| CO                                   | 8 hours          | 9.0 ppm                |
| NO <sub>2</sub>                      | 1 hour           | 0.08 ppm               |
|                                      | 1 year           | 0.015 ppm              |
| Photochemical oxidants<br>(as ozone) | 8 hours          | 0.065 ppm              |
| SO <sub>2</sub>                      | 1 hour           | 0.10 ppm               |
|                                      | 1 day            | 0.02 ppm               |
| Lead                                 | 1 year           | 0.50 µg/m <sup>3</sup> |
| PM <sub>10</sub>                     | 1 day            | 50 µg/m <sup>3</sup>   |
|                                      | 1 year           | 25 µg/m <sup>3</sup>   |
| PM <sub>2.5</sub>                    | 1 day            | 25 µg/m <sup>3</sup>   |
|                                      | 1 year           | 8 µg/m <sup>3</sup>    |

Source: Australian Government, 2021.

**Table S50.** Air Quality Categories (AQC) cut-off values in New South Wales (Australia).

| AQI            | O <sub>3</sub> | NO <sub>2</sub> | Visibility | CO       | SO <sub>2</sub> | PM <sub>10</sub>     | PM <sub>2.5</sub>    |         |
|----------------|----------------|-----------------|------------|----------|-----------------|----------------------|----------------------|---------|
|                |                |                 | Neph       |          |                 |                      |                      |         |
|                | (pphm)         | (pphm)          | (bsp)      | (ppm)    | (pphm)          | (µg/m <sup>3</sup> ) | (µg/m <sup>3</sup> ) |         |
|                | 1-hour         | 4-hour          | 1-hour     | 8-hour   | 1-hour          | 1-hour               | 1-hour               |         |
|                |                | rolling         |            | rolling  |                 |                      |                      |         |
| GOOD           | <6.7           | <5.4            | <8         | <1.5     | <6.0            | <13.3                | <50                  | <25     |
| FAIR           | 6.7-10.0       | 5.4-8.0         | 8-12       | 1.5-3.0  | 6.0-9.0         | 13.3-20.0            | 50-100               | 25-50   |
| POOR           | 10.0-15.0      | 8.0-12.0        | 12-18      | 3.0-6.0  | 9.0-13.5        | 20.0-30.0            | 100-200              | 50-100  |
| VERY POOR      | 15.0-20.0      | 12.0-16.0       | 18-24      | 6.0-18.0 | 13.5-18.0       | 30.0-40.0            | 200-600              | 100-300 |
| EXTREMELY POOR | >20.0          | >16.0           | >24        | >18.0    | >18.0           | >40.0                | >600                 | >300    |

Source: <https://www.environment.nsw.gov.au/topics/air/understanding-air-quality-data/air-quality-categories>

**Table S51.** AQI health messages in New South Wales's (Australia).

| AQIC      | General health advice and recommended actions                                                                                                                                                                                                                                                                                                                                                                                                                                                                 |                                                                                                                                                    |
|-----------|---------------------------------------------------------------------------------------------------------------------------------------------------------------------------------------------------------------------------------------------------------------------------------------------------------------------------------------------------------------------------------------------------------------------------------------------------------------------------------------------------------------|----------------------------------------------------------------------------------------------------------------------------------------------------|
|           | Sensitive groups including:                                                                                                                                                                                                                                                                                                                                                                                                                                                                                   | Everyone else:                                                                                                                                     |
|           | <p>people with a heart or lung condition,<br/>including asthma<br/>people over the age of 65<br/>infants and children<br/>pregnant women</p>                                                                                                                                                                                                                                                                                                                                                                  |                                                                                                                                                    |
| GOOD      | <ul style="list-style-type: none"> <li>• NO CHANGE needed to your normal outdoor activities.</li> </ul>                                                                                                                                                                                                                                                                                                                                                                                                       | <ul style="list-style-type: none"> <li>• NO CHANGE needed to your normal outdoor activities.</li> </ul>                                            |
| FAIR      | <ul style="list-style-type: none"> <li>• REDUCE outdoor physical activity if you develop symptoms such as cough or shortness of breath.</li> <li>• Consider closing windows and doors until outdoor air quality is better.</li> <li>• Follow the treatment plan recommended by your doctor.</li> <li>• If you are concerned about symptoms call the 24-hour Health Direct helpline on 1800 022 222 or see your doctor.</li> <li>• In a health emergency, call triple zero (000) for an ambulance.</li> </ul>  | <ul style="list-style-type: none"> <li>• NO CHANGE needed to your normal outdoor activities.</li> </ul>                                            |
| POOR      | <ul style="list-style-type: none"> <li>• AVOID outdoor physical activity if you develop symptoms such as cough or shortness of breath.</li> <li>• When indoors, close windows and doors until outdoor air quality is better.</li> <li>• Follow the treatment plan recommended by your doctor.</li> <li>• If you are concerned about symptoms call the 24-hour HealthDirect helpline on 1800 022 222 or see your doctor.</li> <li>• In a health emergency, call triple zero (000) for an ambulance.</li> </ul> | <ul style="list-style-type: none"> <li>• REDUCE outdoor physical activity if you develop symptoms such as cough or shortness of breath.</li> </ul> |
| VERY POOR | <ul style="list-style-type: none"> <li>• STAY INDOORS as much as possible with windows and doors closed until outdoor air quality is better.</li> <li>• If you feel that the air in your home is uncomfortable, consider going to a place with cleaner air (such as an air-conditioned</li> </ul>                                                                                                                                                                                                             | <ul style="list-style-type: none"> <li>• AVOID outdoor physical activity if you develop symptoms such as cough or shortness of breath.</li> </ul>  |

|                       |                                                                                                                                                                                                                                                                                                                                                                                                                                                                                                                                                                                                                                                                                   |                                                                                                                                                                                                                                                                                                                                                                                                                                                                                                                                                                            |
|-----------------------|-----------------------------------------------------------------------------------------------------------------------------------------------------------------------------------------------------------------------------------------------------------------------------------------------------------------------------------------------------------------------------------------------------------------------------------------------------------------------------------------------------------------------------------------------------------------------------------------------------------------------------------------------------------------------------------|----------------------------------------------------------------------------------------------------------------------------------------------------------------------------------------------------------------------------------------------------------------------------------------------------------------------------------------------------------------------------------------------------------------------------------------------------------------------------------------------------------------------------------------------------------------------------|
|                       | <p>building like a library or shopping centre) if it is safe to do so.</p> <ul style="list-style-type: none"> <li>• Actively monitor symptoms and follow the treatment plan recommended by your doctor.</li> <li>• If you are concerned about symptoms call the 24-hour HealthDirect helpline on 1800 022 222 or see your doctor.</li> <li>• In a health emergency, call triple zero (000) for an ambulance.</li> </ul>                                                                                                                                                                                                                                                           | <ul style="list-style-type: none"> <li>• When indoors, close windows and doors until outdoor air quality is better.</li> <li>• If you are concerned about symptoms call the 24-hour HealthDirect helpline on 1800 022 222 or see your doctor.</li> <li>• In a health emergency, call triple zero (000) for an ambulance.</li> </ul>                                                                                                                                                                                                                                        |
| <b>EXTREMELY POOR</b> | <ul style="list-style-type: none"> <li>• STAY INDOORS with windows and doors closed until outdoor air quality is better and reduce indoor activity.</li> <li>• If you feel that the air in your home is uncomfortable, consider going to a place with cleaner air (such as an air-conditioned building like a library or shopping centre) if it is safe to do so.</li> <li>• Actively monitor symptoms and follow the treatment plan recommended by your doctor.</li> <li>• If you are concerned about symptoms call the 24-hour Health Direct helpline on 1800 022 222 or see your doctor.</li> <li>• In a health emergency, call triple zero (000) for an ambulance.</li> </ul> | <ul style="list-style-type: none"> <li>• STAY INDOORS as much as possible with windows and doors closed until outdoor air quality is better.</li> <li>• If you feel that the air in your home is uncomfortable, consider going to a place with cleaner air (such as an air-conditioned building like a library or shopping centre) if it is safe to do so.</li> <li>• If you are concerned about symptoms call the 24-hour HealthDirect helpline on 1800 022 222 or see your doctor.</li> <li>• In a health emergency, call triple zero (000) for an ambulance.</li> </ul> |

Source: <https://www.environment.nsw.gov.au/topics/air/understanding-air-quality-data/air-quality-categories>
