# Supplementary material for: An Overview of Experiences Made and Tools Used to Inform the Public on Ambient Air Quality
Source: MDPI journal article supplement (doi:10.3390/atmos12111524), 2021-11-18
Supplement: s1 [file s1]

Archive with 1 entries (1 files):
- atmosphere-1446990-supplementary.pdf
